# Supplementary material
Source: PubMed Central journal article supplement (PMC5579373)

Supplementary Figure S2

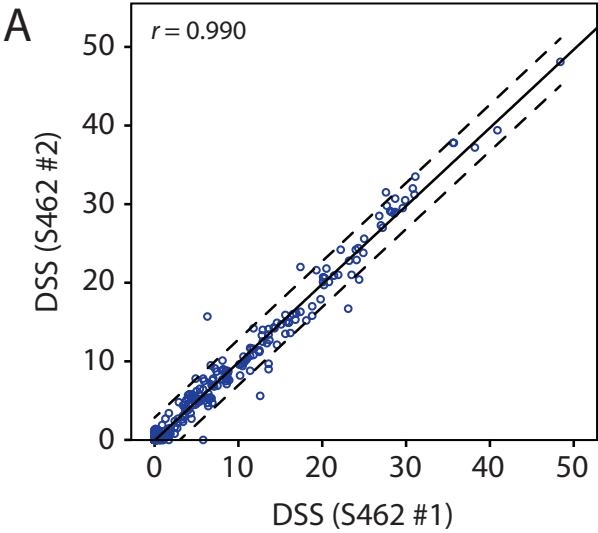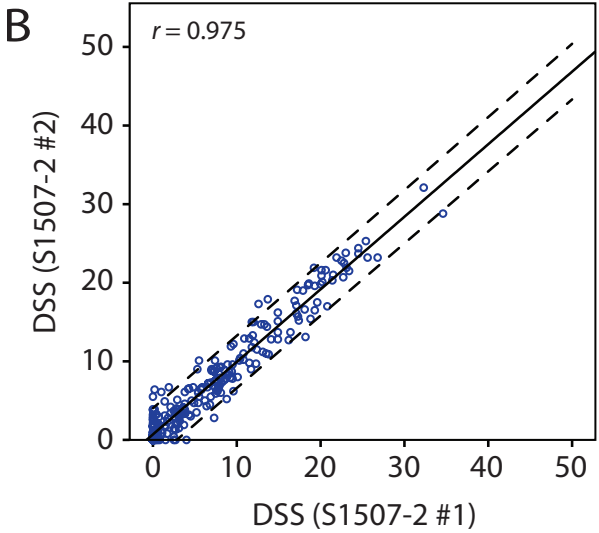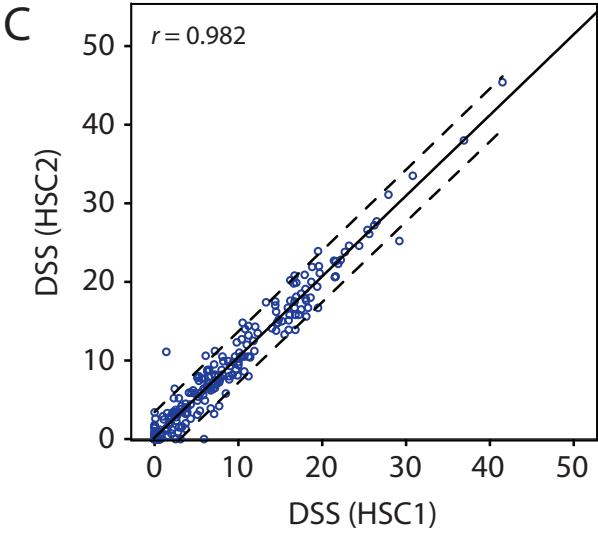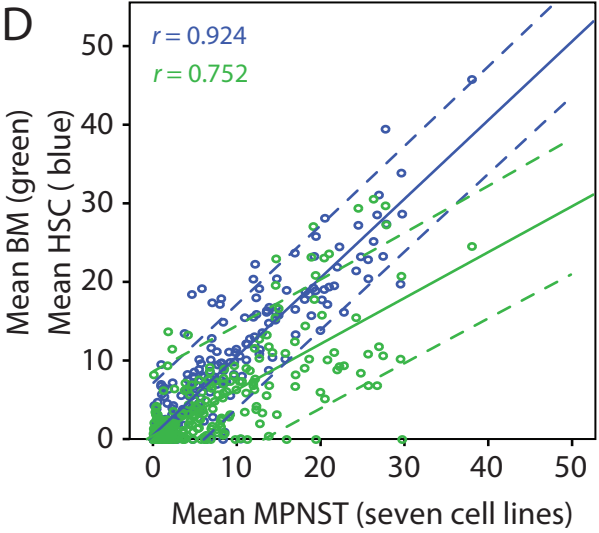

Supplement: MOL2-11-1156-s002.pdf [file MOL2-11-1156-s002.pdf]
