# Supplementary material
Source: PubMed Central journal article supplement (PMC5579373)

# Supplementary Figure S3

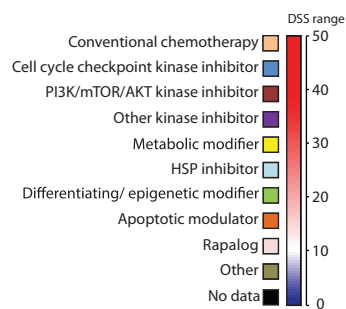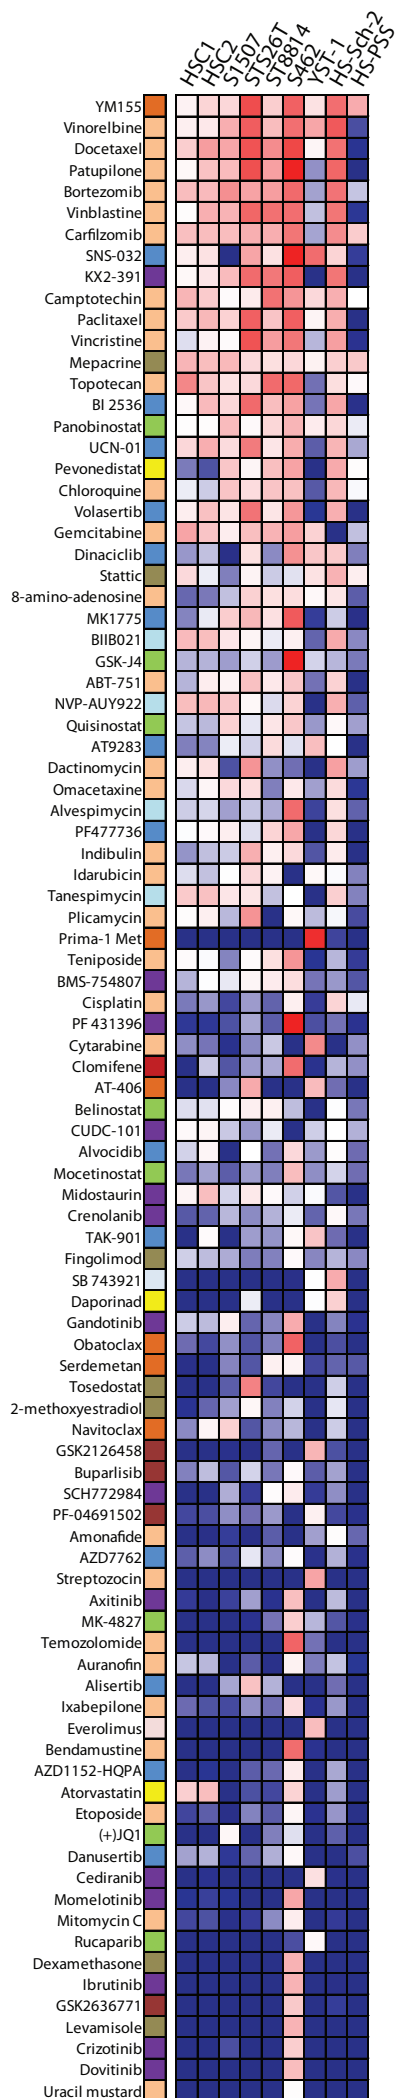

Supplement: MOL2-11-1156-s003.pdf [file MOL2-11-1156-s003.pdf]
