# Supplementary material
Source: PubMed Central journal article supplement (PMC5579373)

# Supplementary Figure S4

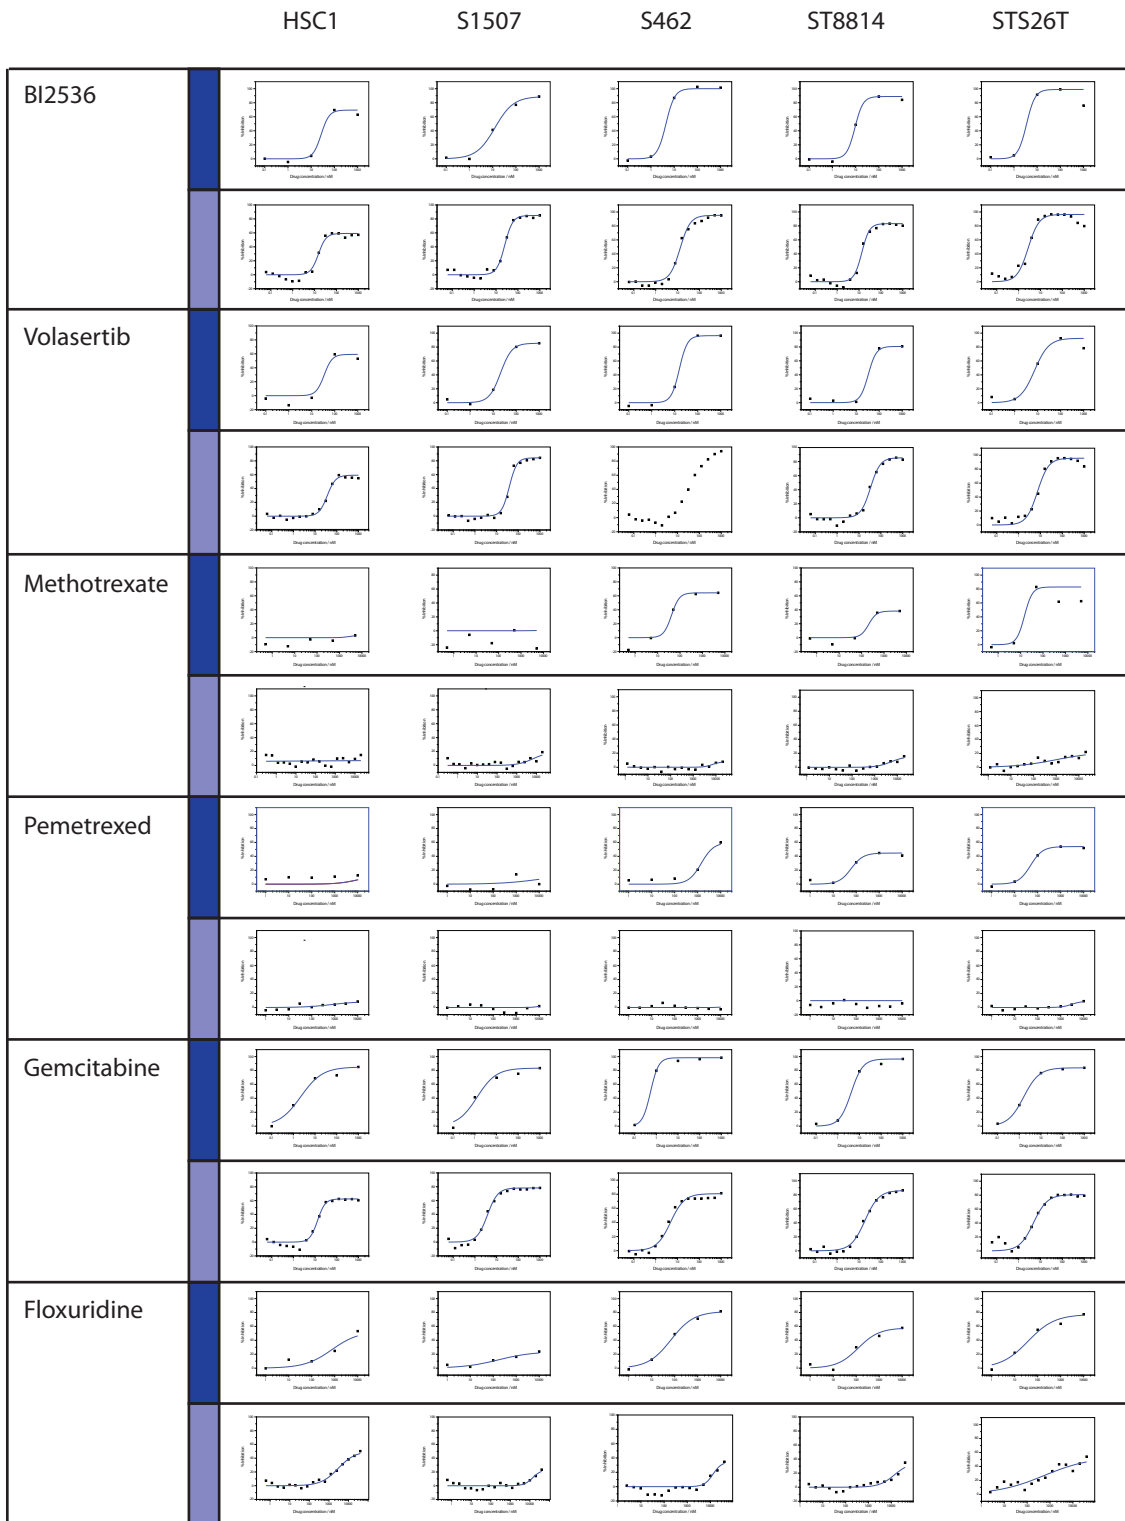

Supplement: MOL2-11-1156-s004.pdf [file MOL2-11-1156-s004.pdf]
