# Supplementary material
Source: PubMed Central journal article supplement (PMC5579373)

# Supplementary Figure S5

**A**

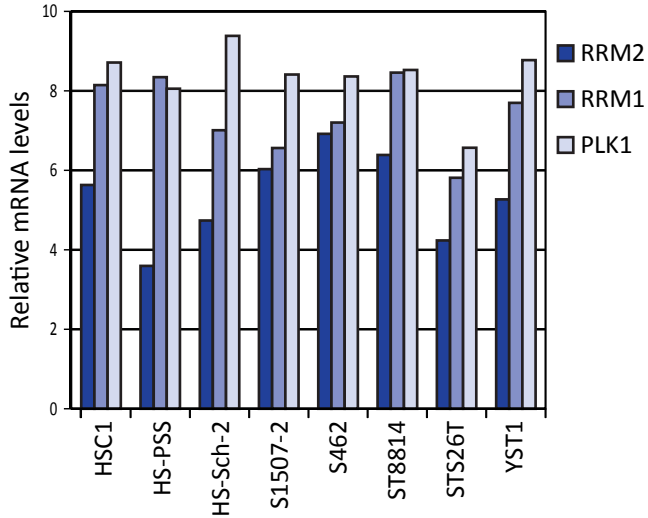

**B**

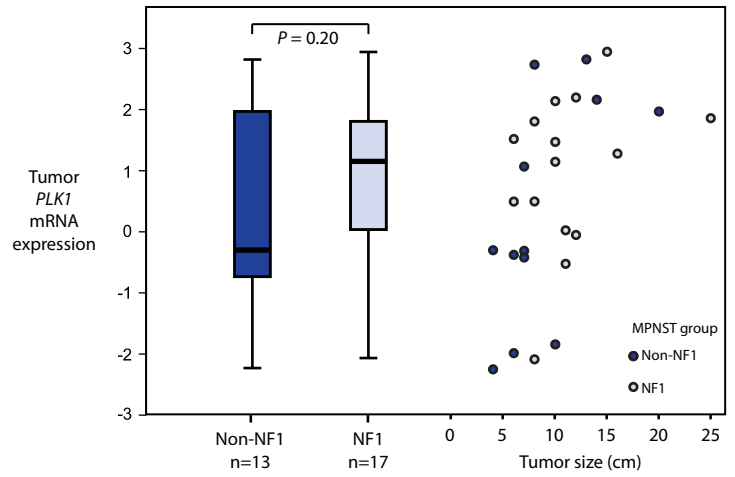

**C**

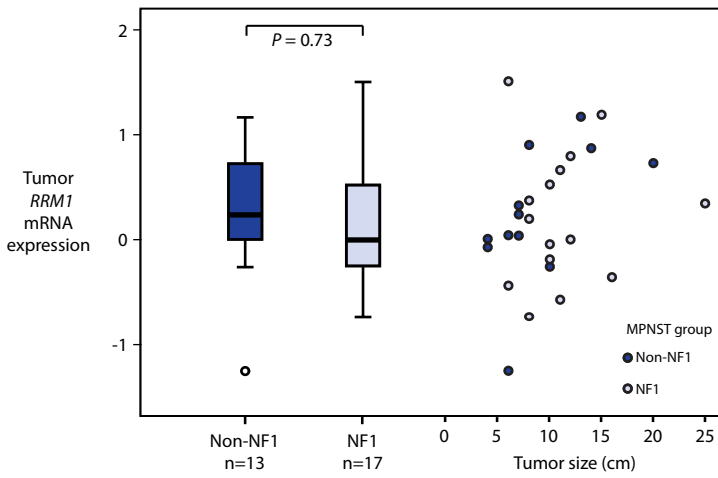

**D**

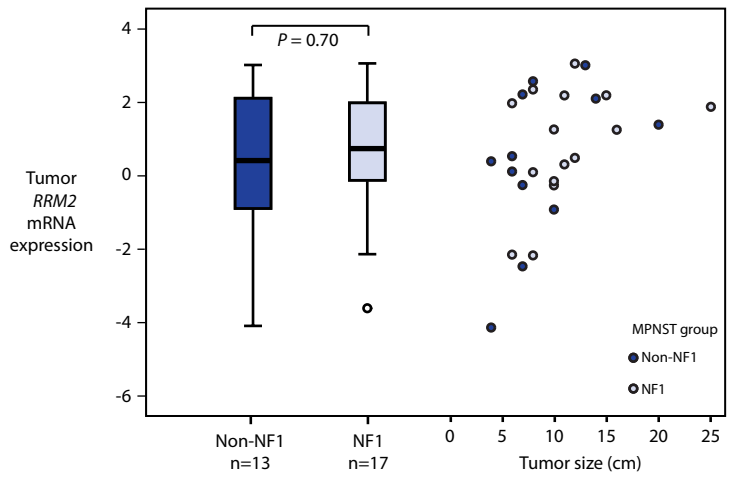

**E**

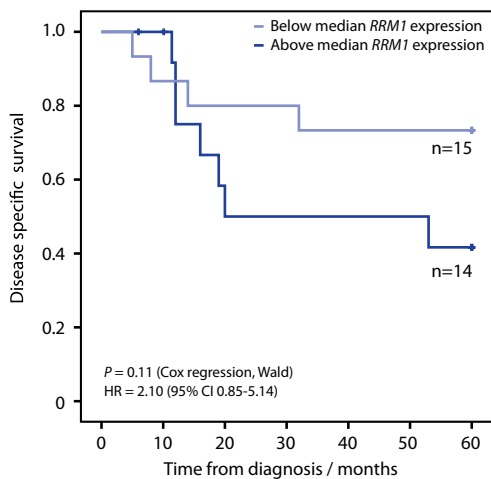

Supplement: MOL2-11-1156-s005.pdf [file MOL2-11-1156-s005.pdf]
