# Supplementary material
Source: PubMed Central journal article supplement (PMC5579373)

# Supplementary Figure S6

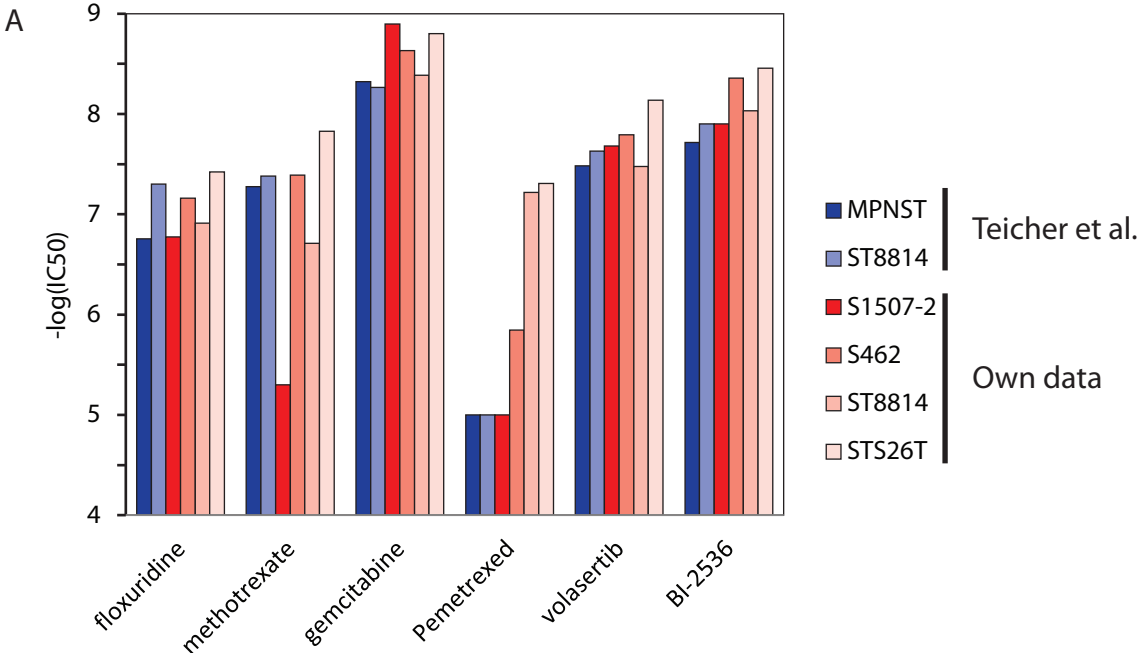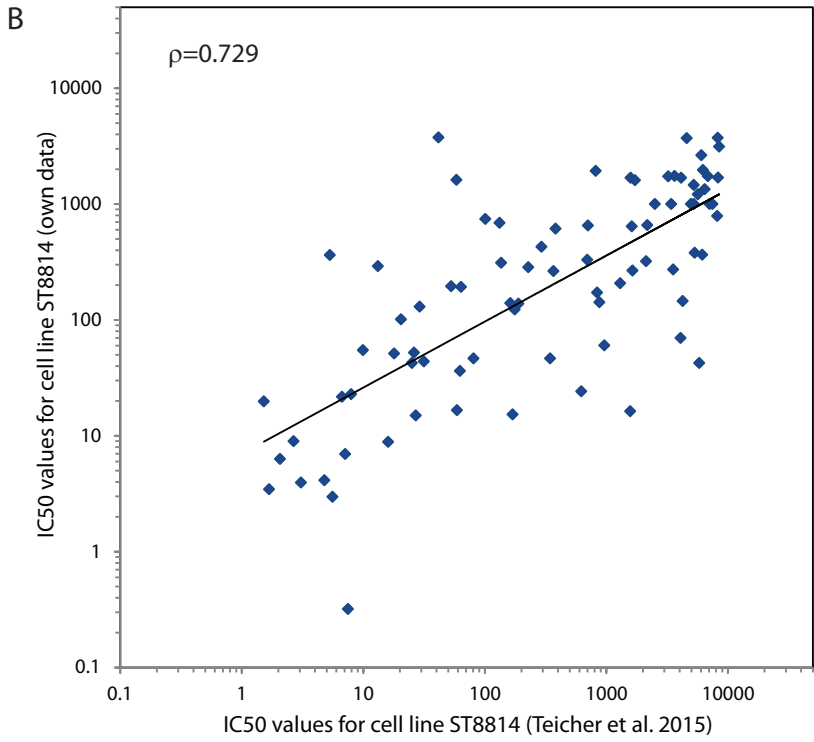

Supplement: MOL2-11-1156-s006.pdf [file MOL2-11-1156-s006.pdf]
